# Supplementary material
Source: publisher figshare collection journal article supplement (https://acs.figshare.com/ndownloader/files/3595710)
Supplement: Supplementary file 1 [file 3595710]

## **Supplementary Tables**

**Supplementary Table S 1 A-G:** Classification of proteins by GO cell compartments and molecular functions

All proteins are listed which were found to be upregulated according to increased emPAI values. Numbers indicate distinct peptides and (xx) indicate proteins found to be elevated in both resistant cells. Proteins are indicated by “A c” or “M c” if they are upregulated upon cisplatin treatment in A375 or M24met cells, respectively. Proteins are sorted according to protein names and identified by their SwissProt accession numbers.

**Supplementary Table S 1A:** Proteins annotated as lysosomal proteins identified by mass spectrometry in A375, M24met, HeLa and TMFI cells.

**Supplementary Table S 1B:** Proteins annotated as cell junction proteins identified by mass spectrometry in A375, M24met, HeLa and TMFI cells.

**Supplementary Table S 1C:** Proteins annotated as cell adhesion proteins identified by mass spectrometry in A375, M24met, HeLa and TMFI cells.

**Supplementary Table S 1D:** Proteins annotated as focal adhesion proteins identified by mass spectrometry in A375, M24met, HeLa and TMFI cells.

**Supplementary Table S 1E:** Proteins annotated as ECM proteins identified by mass spectrometry in A375, M24met, HeLa and TMFI cells.

**Supplementary Table S 1F:** Proteins annotated as Ca<sup>2+</sup> ion binding proteins identified by mass spectrometry in A375, M24met, HeLa and TMFI cells.

**Supplementary Table S 1G:** Proteins annotated as MAPK activity proteins identified by mass spectrometry in A375, M24met, HeLa and TMFI cells.

**Supplementary Table S 2:** Selected list of proteins of all categories regulated in both resistant cell lines.

All proteins are listed which were found to be upregulated according to increased emPAI values. Numbers indicate distinct peptides and (xx) indicate proteins found to be elevated in both resistant cells. Proteins are indicated by "A c" or "M c" if they are upregulated upon cisplatin treatment in A375 or M24met cells, respectively. Proteins are sorted according to protein names and identified by their SwissProt accession numbers. Redundancy is indicated by x.

**Supplementary Table S 3:** Survival proteins. List of survival proteins in A375, M24met, HeLa and TMFI tumor cell lines. Bold, proteins selected as member of the resistance signature. Function of proteins from uniprot.

**Supplementary Table S 4:** Resistance signature. Selection of resistance signatures of three different categories: cell adherence function in yellow, lysosomes in orange and survival proteins in green.

**Supplementary Table S 5:** The corresponding emPAI levels of the selected lysosomal, cell adherens and survival proteins are listed.
